# Supplementary material for: Response to the coronavirus disease 2019 (COVID-19) pandemic at private retail pharmacies in Kenya: a mixed methods study
Source: bioRxiv or medRxiv preprint supplement (doi:10.1101/2021.10.22.21265188), 2021-10-26
Supplement: Supplementary file [file media-1.pdf]

## Supplementary Table I: Characteristics of participating pharmacies and respondents

### *A. Characteristics of participating pharmacies*

| Characteristic                                     | Nairobi<br>(n=38) |      | Mombasa<br>(n=36) |      | Kisumu<br>(n=34) |      | Total<br>(n=108) ^ |      |
|----------------------------------------------------|-------------------|------|-------------------|------|------------------|------|--------------------|------|
|                                                    | n                 | %    | n                 | %    | n                | %    | n                  | %    |
| <b>Setting</b>                                     |                   |      |                   |      |                  |      |                    |      |
| Urban commercial centre                            | 23                | 61%  | 29                | 81%  | 12               | 35%  | 64                 | 59%  |
| Urban residential area                             | 13                | 34%  | 4                 | 11%  | 6                | 18%  | 23                 | 21%  |
| Urban informal settlement                          | 2                 | 5%   | 3                 | 8%   | 2                | 6%   | 7                  | 6%   |
| Rural town/ shopping centre                        | 0                 | 0%   | 0                 | 0%   | 14               | 41%* | 14                 | 13%  |
| <b>Years of operation</b>                          |                   |      |                   |      |                  |      |                    |      |
| Number of years in operation (median [range])      | 5                 | 1-19 | 4                 | 1-42 | 5                | 1-11 | 5                  | 1-42 |
| <b>Physical facilities</b>                         |                   |      |                   |      |                  |      |                    |      |
| Total number of rooms (Median [range])             | 2                 | 1-10 | 2                 | 1-6  | 2                | 1-8  | 1                  | 1-10 |
| Consultation room                                  | 14                | 37%  | 10                | 28%  | 20               | 59%* | 44                 | 41%  |
| On-site lab                                        | 5                 | 13%  | 1                 | 3%   | 6                | 18%  | 12                 | 11%  |
| <b>Information systems</b>                         |                   |      |                   |      |                  |      |                    |      |
| Computerized stock system                          | 29                | 81%* | 19                | 53%  | 23               | 68%  | 71                 | 67%  |
| Individual medical records <sup>1</sup>            | 9                 | 25%  | 2                 | 6%   | 7                | 21%  | 18                 | 17%  |
| <b>Chain network membership<sup>2</sup></b>        |                   |      |                   |      |                  |      |                    |      |
| Part of a chain network                            | 9                 | 24%* | 3                 | 8%   | 1                | 3%   | 13                 | 12%  |
| Number of branches nationwide (Median [range])     | 1                 | 1-41 | 1                 | 1-41 | 1                | 1-9  | 1                  | 1-41 |
| <b>Branding<sup>3</sup></b>                        |                   |      |                   |      |                  |      |                    |      |
| None                                               | 33                | 87%  | 29                | 81%  | 32               | 94%  | 94                 | 87%  |
| Green Cross                                        | 2                 | 5%   | 2                 | 6%   | 0                | 0%   | 4                  | 4%   |
| Pharmnet (blue cross)                              | 0                 | 0%   | 3                 | 8%   | 1                | 3%   | 4                  | 4%   |
| Corporate                                          | 3                 | 8%   | 2                 | 6%   | 1                | 3%   | 6                  | 6%   |
| <b>Distance to the nearest clinic</b>              |                   |      |                   |      |                  |      |                    |      |
| Within the pharmacy                                | 0                 | 0%   | 0                 | 0%   | 2                | 6%   | 2                  | 2%   |
| < 100 meters                                       | 17                | 45%  | 13                | 36%  | 9                | 26%  | 39                 | 36%  |
| < 1km                                              | 19                | 50%  | 16                | 44%  | 21               | 62%  | 56                 | 52%  |
| < 5km                                              | 2                 | 5%   | 7                 | 19%  | 2                | 6%   | 11                 | 10%  |
| <b>Distance to the nearest HIV testing site</b>    |                   |      |                   |      |                  |      |                    |      |
| < 100 meters                                       | 14                | 37%  | 12                | 33%  | 11               | 32%  | 37                 | 34%  |
| < 1km                                              | 18                | 47%  | 16                | 44%  | 21               | 62%  | 55                 | 51%  |
| < 5km                                              | 4                 | 11%  | 7                 | 19%  | 2                | 6%   | 13                 | 12%  |
| >5km                                               | 1                 | 3%   | 0                 | 0%   | 0                | 0%   | 1                  | 1%   |
| Not sure                                           | 1                 | 3%   | 1                 | 3%   | 0                | 0%   | 2                  | 2%   |
| <b>Service providers</b>                           |                   |      |                   |      |                  |      |                    |      |
| Total number of service providers (Median [range]) | 3*                | 1-16 | 2                 | 1-9  | 2                | 1-4  | 2                  | 1-16 |
| At least one pharmacy degree holder                | 8                 | 21%  | 7                 | 19%  | 3                | 9%   | 18                 | 17%  |

| Characteristic                                 | Nairobi<br>(n=38) |        | Mombasa<br>(n=36) |        | Kisumu<br>(n=34) |        | Total<br>(n=108) ^ |        |
|------------------------------------------------|-------------------|--------|-------------------|--------|------------------|--------|--------------------|--------|
|                                                | n                 | %      | n                 | %      | n                | %      | n                  | %      |
| At least one pharmacy diploma holder           | 36                | 95%    | 35                | 97%    | 34               | 100%   | 105                | 97%    |
| All staff belong in a professional association | 24                | 63%    | 19                | 53%    | 18               | 53%    | 61                 | 56%    |
| <b>Management</b>                              |                   |        |                   |        |                  |        |                    |        |
| Written job descriptions                       | 21                | 55%    | 12                | 33%    | 14               | 41%    | 47                 | 44%    |
| Regular staff meetings <sup>4</sup>            | 21                | 55%    | 16                | 44%    | 19               | 56%    | 56                 | 52%    |
| <b>Opening hours</b>                           |                   |        |                   |        |                  |        |                    |        |
| 24 hours daily, 7 days a week                  | 4                 | 11%    | 1                 | 3%     | 1                | 3%     | 6                  | 6%     |
| At least seven days a week                     | 23                | 61%    | 28                | 78%    | 25               | 74%    | 76                 | 70%    |
| At least 6 days a week                         | 38                | 100%   | 34                | 94%    | 34               | 100%   | 106                | 98%    |
| <b>Work load</b>                               |                   |        |                   |        |                  |        |                    |        |
| Walk-in clients per day (Median [range])       | 55                | 15-300 | 50                | 20-200 | 40               | 20-200 | 50                 | 15-300 |
| Online clients per day (Median [range])        | 1                 | 0-20   | 0                 | 0-20   | 0                | 0-10   | 0                  | 0-20   |
| <b>Health promotion services</b>               |                   |        |                   |        |                  |        |                    |        |
| Over-the-counter STI treatment                 | 29                | 76%    | 29                | 81%    | 30               | 88%    | 88                 | 81%    |
| Weight management                              | 12                | 32%    | 6                 | 17%    | 10               | 29%    | 28                 | 26%    |
| Smoking cessation                              | 4                 | 11%    | 1                 | 3%     | 1                | 3%     | 6                  | 6%     |
| Vaccination                                    | 0                 | 0%     | 1                 | 3%     | 3                | 9%     | 4                  | 4%     |
| <b>Screening services</b>                      |                   |        |                   |        |                  |        |                    |        |
| Blood pressure measurement                     | 26                | 68%    | 26                | 72%    | 25               | 74%    | 77                 | 71%    |
| Blood sugar testing                            | 19                | 50%    | 25                | 69%    | 20               | 59%    | 64                 | 59%    |
| HIV self-testing                               | 21                | 55%    | 22                | 61%    | 20               | 59%    | 63                 | 58%    |
| Malaria testing                                | 9                 | 24%    | 19                | 53%    | 27               | 79%*   | 55                 | 51%    |
| In-pharmacy pregnancy testing                  | 9                 | 24%    | 9                 | 25%    | 18               | 53%*   | 36                 | 33%    |
| Other screening services <sup>5</sup>          | 1                 | 3%     | 0                 | 0%     | 5                | 15%*   | 6                  | 6%     |

^ Of 195 target pharmacies that had participated in the previous PHP study, 108 (55%) participated in the current survey. Of 87 that did not participate: 55 (63%) failed to complete the questionnaire after three reminders, 15 (17%) reported that the initial respondent had left and no one else was willing to participate, 8 (9%) were unreachable, 3 (3%) reported that the management did not approve participation, 2 (1%) were undergoing transition, 1 (1%) was closed, and 3 (3%) had other reasons (no access to smartphone or computer, preferred face-to-face interview, sold the pharmacy).

\* Indicates significant difference between counties ( $p < 0.05$ ), based on chi square test or analysis of variance for means

<sup>1</sup> An individual medical record is a document detailing the medications an individual patient is on, indications and drug allergies; may also include other clinical information.

<sup>2</sup> Chain network was defined as 6 or more branches nationwide, derived from chain size distribution pattern; 79 (73%) pharmacies were single branch, 16 (15%) were part of a 2-5 branch network, and 13 (12%) were part of a chain network

<sup>3</sup> Green Cross is a professional network of pharmacies owned by pharmacists; Pharmnet is for pharmaceutical technologists

<sup>4</sup> Excludes 18 pharmacies that responded "not applicable" since they have only one staff member

<sup>5</sup> Other screening services included; typhoid testing (n=4) and tuberculosis screening (n=2)

STI: Sexually transmitted infection

*B. Characteristics of respondents*

| Characteristic                                         | Nairobi<br>(N=38) |      | Mombasa<br>(N=36) |      | Kisumu<br>(N=34) |      | Total<br>(N=108) |      |
|--------------------------------------------------------|-------------------|------|-------------------|------|------------------|------|------------------|------|
|                                                        | n                 | %    | n                 | %    | n                | %    | n                | %    |
| <b>Gender</b>                                          |                   |      |                   |      |                  |      |                  |      |
| Female                                                 | 12                | 32%  | 13                | 36%  | 16               | 47%  | 41               | 38%  |
| Male                                                   | 26                | 68%  | 23                | 64%  | 18               | 53%  | 67               | 62%  |
| <b>Age</b>                                             |                   |      |                   |      |                  |      |                  |      |
| 20 – 29 years                                          | 12                | 32%  | 12                | 33%  | 14               | 41%  | 38               | 35%  |
| 30 – 39 years                                          | 19                | 50%  | 18                | 50%  | 16               | 47%  | 53               | 49%  |
| 40 – 44 years                                          | 5                 | 13%  | 4                 | 11%  | 2                | 6%   | 11               | 10%  |
| 45 years and over                                      | 2                 | 5%   | 2                 | 6%   | 2                | 6%   | 6                | 6%   |
| <b>Designation (role)</b>                              |                   |      |                   |      |                  |      |                  |      |
| Owner                                                  | 9                 | 24%  | 12                | 33%  | 12               | 35%  | 33               | 31%  |
| In-charge/ Superintendent                              | 11                | 29%  | 13                | 36%  | 8                | 24%  | 32               | 30%  |
| Staff <sup>1</sup>                                     | 18                | 47%  | 11                | 31%  | 14               | 41%  | 43               | 40%  |
| <b>Highest level of education<sup>2</sup></b>          |                   |      |                   |      |                  |      |                  |      |
| Non-health qualifications                              | 0                 | 0%   | 2                 | 6%   | 1                | 3%   | 3                | 3%   |
| Health-related certificate/ diploma/ bachelor's degree | 2                 | 5%   | 0                 | 0%   | 2                | 6%   | 4                | 4%   |
| Pharmacy certificate                                   | 2                 | 5%   | 0                 | 0%   | 1                | 3%   | 3                | 3%   |
| Pharmacy Diploma                                       | 29                | 76%  | 31                | 86%  | 28               | 82%  | 88               | 81%  |
| Pharmacy degree                                        | 3                 | 8%   | 3                 | 8%   | 0                | 0%   | 6                | 6%   |
| Health-related master's degree                         | 2                 | 5%   | 0                 | 0%   | 2                | 6%   | 4                | 4%   |
| <b>Experience (Median [Range])</b>                     |                   |      |                   |      |                  |      |                  |      |
| Total number of years worked                           | 7                 | 1-25 | 5                 | 2-41 | 6                | 2-20 | 6                | 1-41 |
| Number of years worked in the current pharmacy         | 3                 | 1-14 | 3                 | 1-30 | 3                | 1-17 | 3                | 1-30 |

<sup>1</sup> Staff designations included: pharmaceutical technologist (n=35), pharmacist (n=5), pharmacy assistant (n=2), and nurse aid (n=1)

<sup>2</sup> Non-health qualifications included: business management (n=1), supplies management (n=1), and college (n=1); health-related certificate/ diploma/ bachelor's degree included: medicine (n=1), nursing (n=2), and environmental health (n=1); health-related master's degree included: pharmacy (n=1), and other (n=3)
