# Supplementary material for: Response to the coronavirus disease 2019 (COVID-19) pandemic at private retail pharmacies in Kenya: a mixed methods study
Source: bioRxiv or medRxiv preprint supplement (doi:10.1101/2021.10.22.21265188), 2021-10-26
Supplement: Supplementary file [file media-2.pdf]

**Supplementary Table II. Characteristics of in-depth interview participants.** The interviewee # is used to reference illustrative quotes in the results section. Rows are sorted by interviewee #.

| Interviewee # | County  | Practice setting            | Sex    | Age category (years) | Highest level of education     | Years in practice | Position          |
|---------------|---------|-----------------------------|--------|----------------------|--------------------------------|-------------------|-------------------|
| 101           | Nairobi | Urban residential area      | Female | 20 - 24              | Pharmacy Diploma               | 4                 | Staff             |
| 102           | Nairobi | Urban commercial center     | Male   | 30 - 34              | Pharmacy Diploma               | 10                | Superintendent    |
| 103           | Nairobi | Urban commercial center     | Male   | 25 - 29              | Pharmacy degree                | 2                 | Staff             |
| 104           | Nairobi | Urban commercial center     | Female | 30 - 34              | pharmacy assistant certificate | 8                 | Staff             |
| 105           | Nairobi | Urban commercial center     | Male   | 25 - 29              | Pharmacy Diploma               | 6                 | Superintendent    |
| 106           | Nairobi | Urban residential area      | Male   | 35 - 39              | Pharmacy Diploma               | 10                | Superintendent    |
| 201           | Mombasa | Urban commercial center     | Female | 25 - 29              | Pharmacy Diploma               | 5                 | In-charge         |
| 202           | Mombasa | Urban commercial center     | Male   | 40 - 44              | Pharmacy Diploma               | 10                | Owner or director |
| 203           | Mombasa | Urban informal settlement   | Male   | 35 - 39              | BSc supply chain               | 5                 | Owner or director |
| 204           | Mombasa | Urban commercial center     | Male   | 25 - 29              | Pharmacy Diploma               | 4                 | Staff             |
| 205           | Mombasa | Urban commercial center     | Male   | 25 - 29              | Pharmacy Diploma               | 4                 | Superintendent    |
| 206           | Mombasa | Urban commercial center     | Female | 20 - 24              | Pharmacy Diploma               | 2                 | Staff             |
| 301           | Kisumu  | Urban commercial center     | Male   | 25 - 29              | Pharmacy Diploma               | 2                 | Staff             |
| 302           | Kisumu  | Rural town/ shopping center | Female | 40 - 44              | Nursing certificate            | 17                | Staff             |
| 303           | Kisumu  | Urban commercial center     | Male   | 30 - 34              | Pharmacy Diploma               | 7                 | Superintendent    |
| 304           | Kisumu  | Rural town/ shopping center | Female | 35 - 39              | Pharmacy Diploma               | 7                 | Superintendent    |
| 305           | Kisumu  | Rural town/ shopping center | Female | 30 - 34              | Health-related masters         | 9                 | Owner or director |
| 306           | Kisumu  | Rural town/ shopping center | Male   | 35 - 39              | Health-related masters         | 10                | Owner or director |
